# Supplementary material for: Experimental and theoretical studies of the [3,3]-sigmatropic rearrangement of prenyl azides
Source: Royal Society of Chemistry journal article supplement (doi:10.1039/c7ra09759j), 2017-01-01
Supplement: c7ra09759j1.pdf [file c7ra09759j1.pdf]

Supporting Information for

**Experimental and theoretical studies of the [3,3]-sigmatropic rearrangement of  
isoprenylazides.**

Exequiel O. J. Porta,<sup>a</sup> Margarita M. Vallejos,<sup>b</sup> Andrea B. J. Bracca,<sup>a</sup> and Guillermo R. Labadie<sup>a,c\*</sup>

<sup>a</sup> Instituto de Química Rosario (QUIR-CONICET), Facultad de Ciencias Bioquímicas y Farmacéuticas, Universidad Nacional de Rosario. Suipacha 531, S2002LRK, Rosario, ARGENTINA.

<sup>b</sup> Laboratorio de Química Orgánica, IQUIBA-NEA, Universidad Nacional del Nordeste, CONICET, FACENA, Av. Libertad 5460, Corrientes 3400, Argentina.

<sup>c</sup> Departamento de Química Orgánica, Facultad de Ciencias Bioquímicas y Farmacéuticas, Universidad Nacional de Rosario, Suipacha 531, S2002LRK, Rosario, Argentina.

\*Corresponding author

E-mail: labadie@iquir-conicet.gov.ar

## List of Supporting Information

|                                                             |           |
|-------------------------------------------------------------|-----------|
| <b>Spectral Data</b> .....                                  | <b>3</b>  |
| Compound 6a and 6a rearr .....                              | 3         |
| Compound 6b- <i>E</i> , 6b- <i>Z</i> and 6b- <i>t</i> ..... | 4         |
| Compound 6c- <i>E</i> , 6b- <i>Z</i> and 6b- <i>t</i> ..... | 5         |
| Compound 6d- <i>E</i> , 6b- <i>Z</i> and 6b- <i>t</i> ..... | 6         |
| Compound 6d- <i>E</i> , 6b- <i>Z</i> and 6b- <i>t</i> ..... | 7         |
| Compound 8 .....                                            | 8         |
| Compound 10 .....                                           | 9         |
| Compound 11 .....                                           | 10        |
| Compound 12 .....                                           | 11        |
| <b>Computational Studies</b> .....                          | <b>12</b> |
| Table S1 .....                                              | 12        |
| Figure S1 .....                                             | 13        |
| Figure S2 .....                                             | 14        |
| Figure S3 .....                                             | 15        |
| Figure S4 and Figure S5 .....                               | 16        |
| Figure S6 and Figure S7 .....                               | 17        |
| Figure S8 .....                                             | 18        |
| Cartesian coordinates for 6a.....                           | 19        |
| 8.....                                                      | 20        |
| 12.....                                                     | 21        |
| TS-6a.....                                                  | 22        |
| TS-8.....                                                   | 23        |
| TS-12.....                                                  | 24        |
| 6a rearr .....                                              | 25        |
| 8 rearr .....                                               | 26        |
| 12 rearr .....                                              | 27        |

## Supplementary Material

Spectral data of 1-azido-3-methylbut-2-ene (**6a**) and 3-azido-3-methylbut-1-ene (**6a rearr**) 6.4% w/w in Toluene/Ethyl Ether.

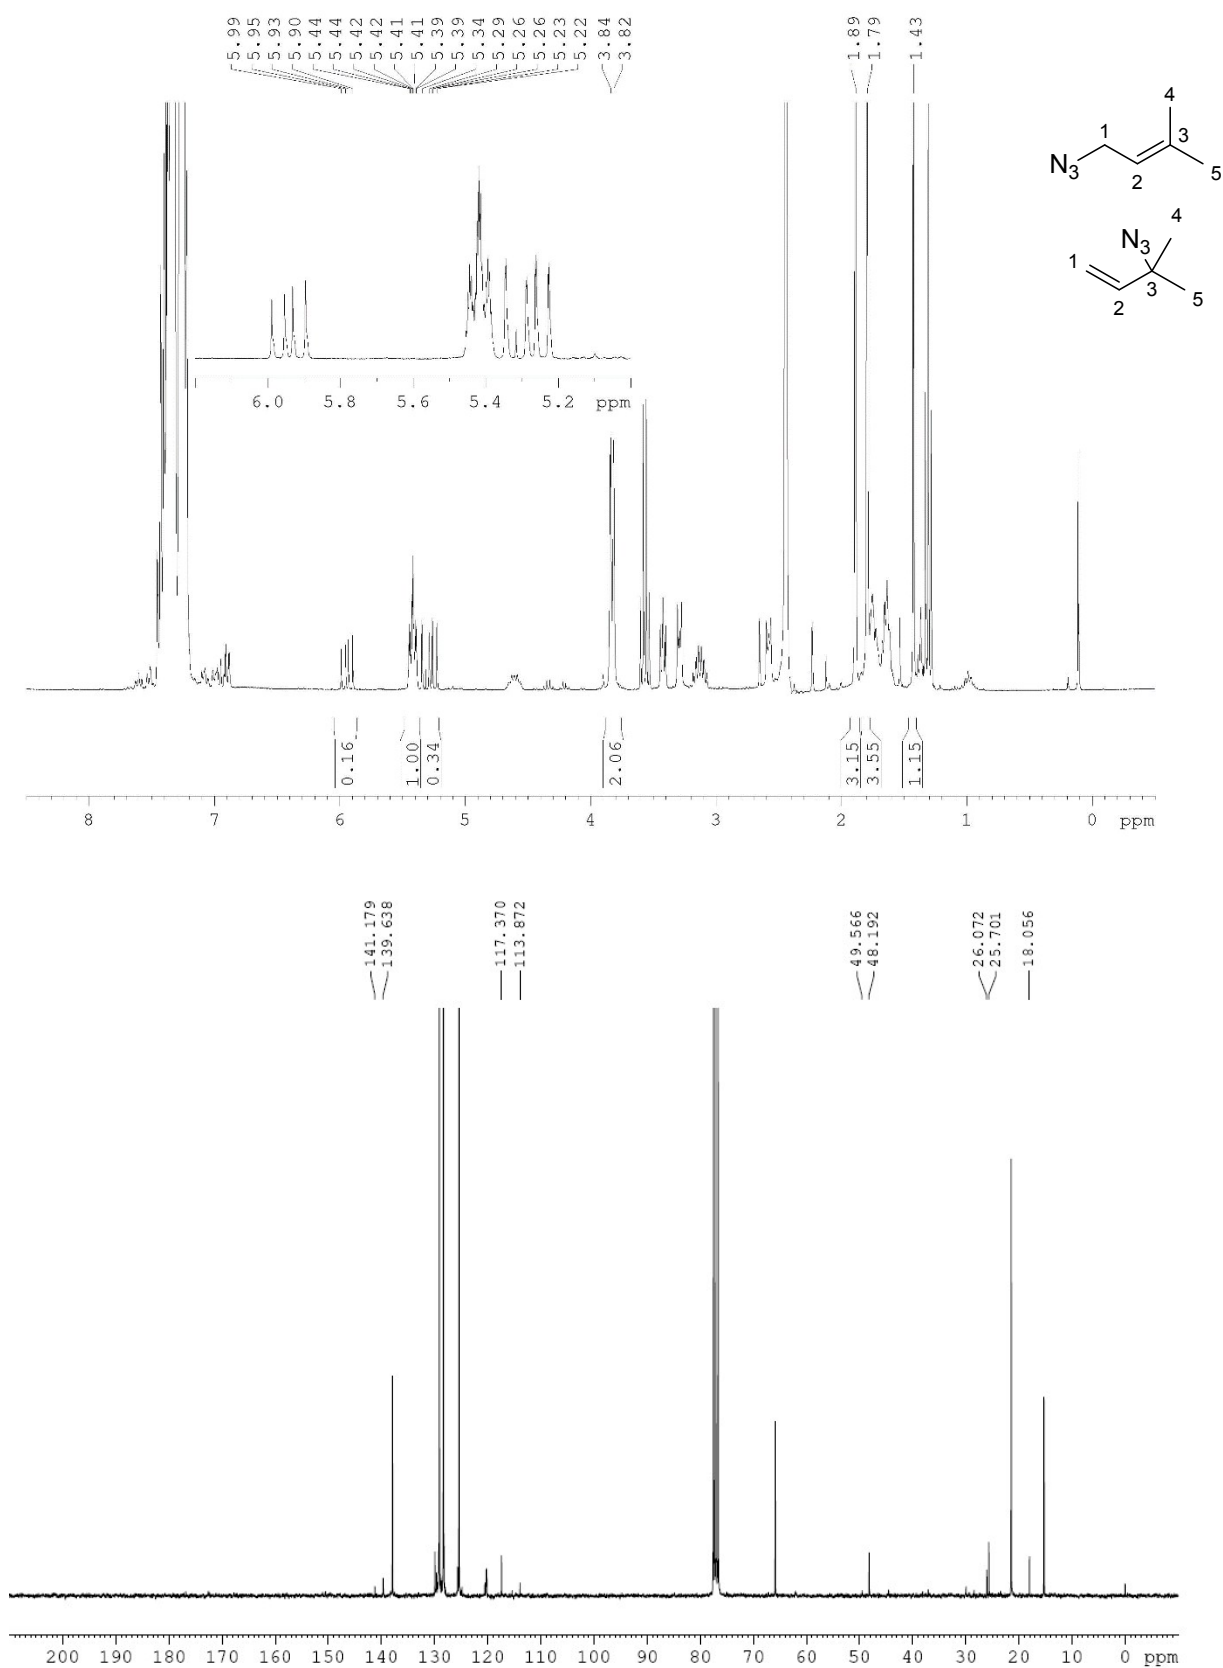

Spectral data of (*E*)-1-azido-3,7-dimethylocta-2,6-diene (**6a-E**); (*Z*)-1-azido-3,7-dimethylocta-2,6-diene (**6b-Z**) and 3-azido-3,7-dimethylocta-1,6-diene (**6a-t**)

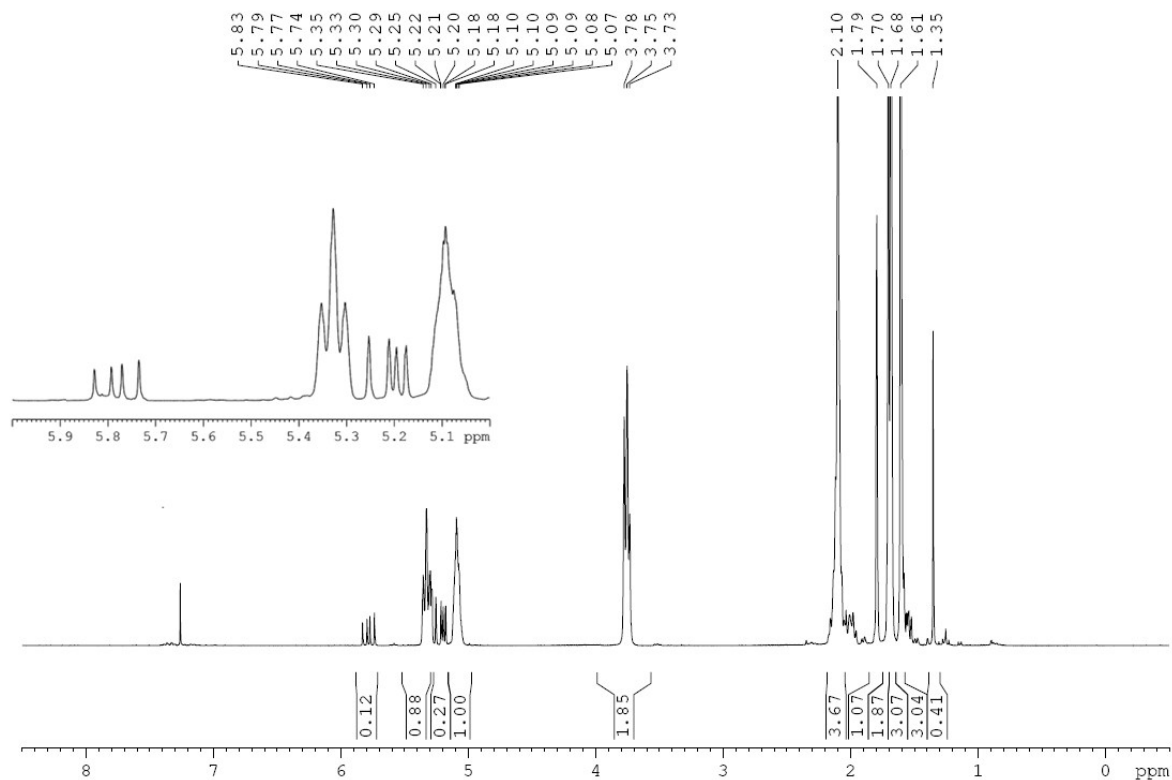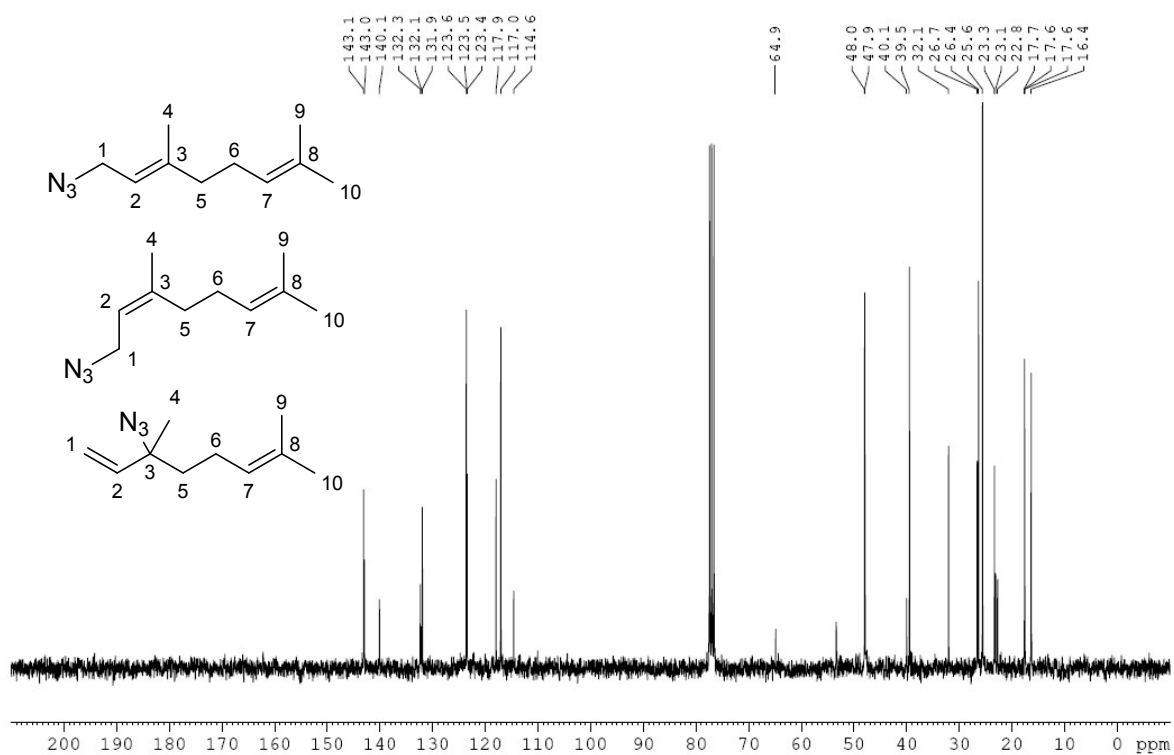

Spectral data of (2*E*,6*E*)-1-azido-3,7,11-trimethyldodeca-2,6,10-triene (**6c-E**); (2*Z*,6*E*)-1-azido-3,7,11-trimethyldodeca-2,6,10-triene (**6c-Z**) and (*E*)-3-azido-3,7,11-trimethyldodeca-1,6,10-triene (**6c-t**)

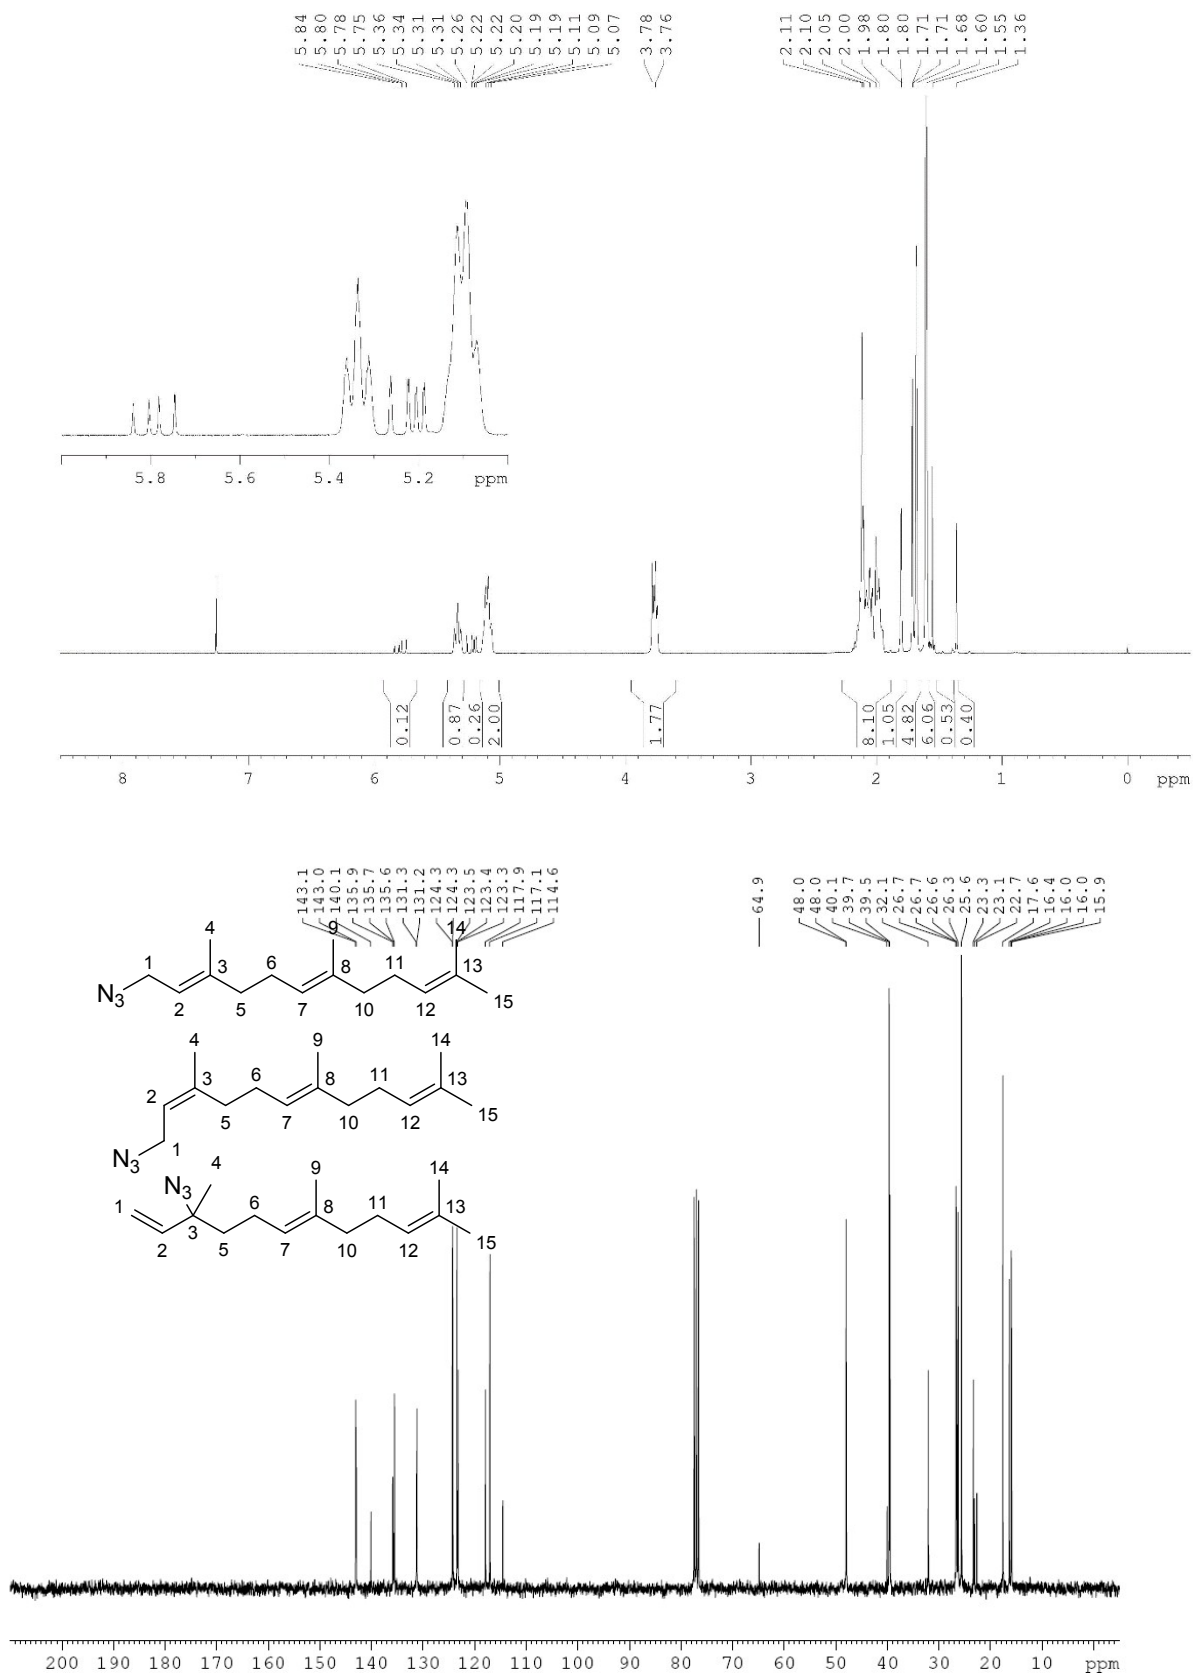

Spectral data of (2*E*,6*E*,10*E*)-1-azido-3,7,11,15-tetramethylhexadeca-2,6,10,14-tetraene (**6d-E**); (2*Z*,6*E*,10*E*)-1-azido-3,7,11,15-tetramethylhexadeca-2,6,10,14-tetraene (**6d-Z**) and (6*E*,10*E*)-3-azido-3,7,11,15-tetramethylhexadeca-1,6,10,14-tetraene (**6d-t**)

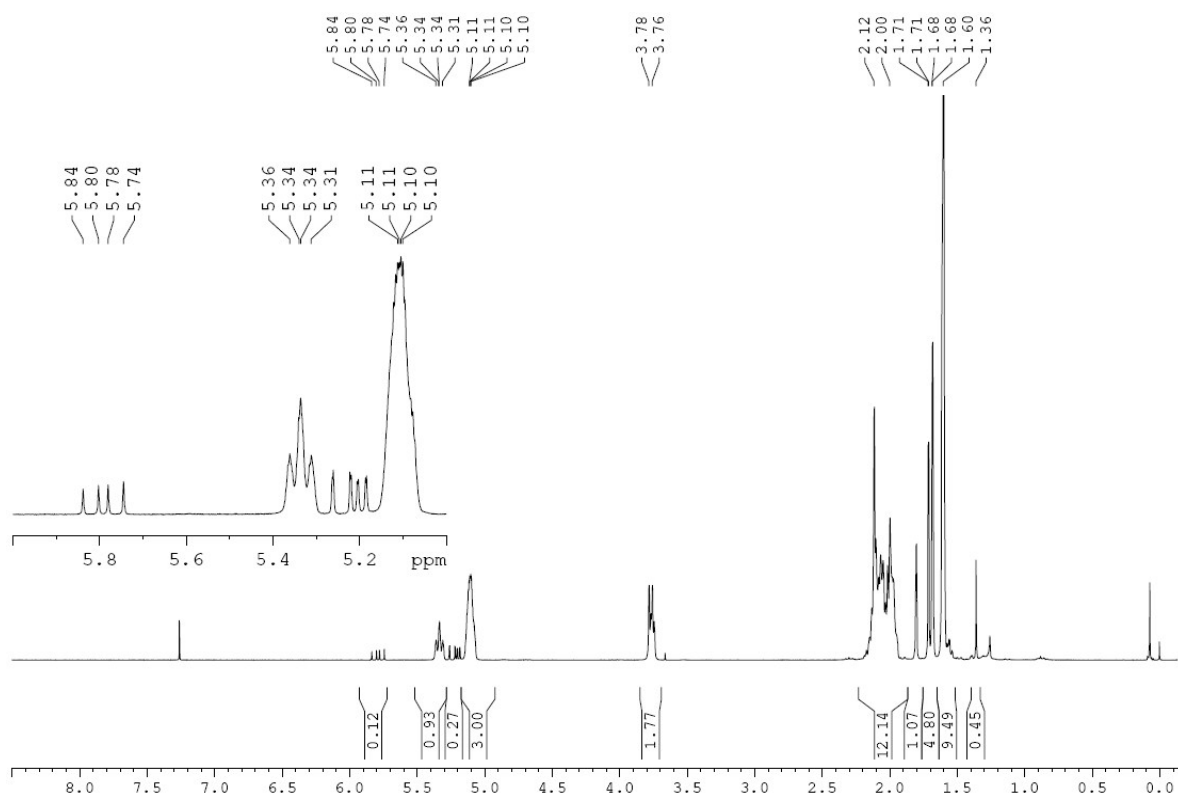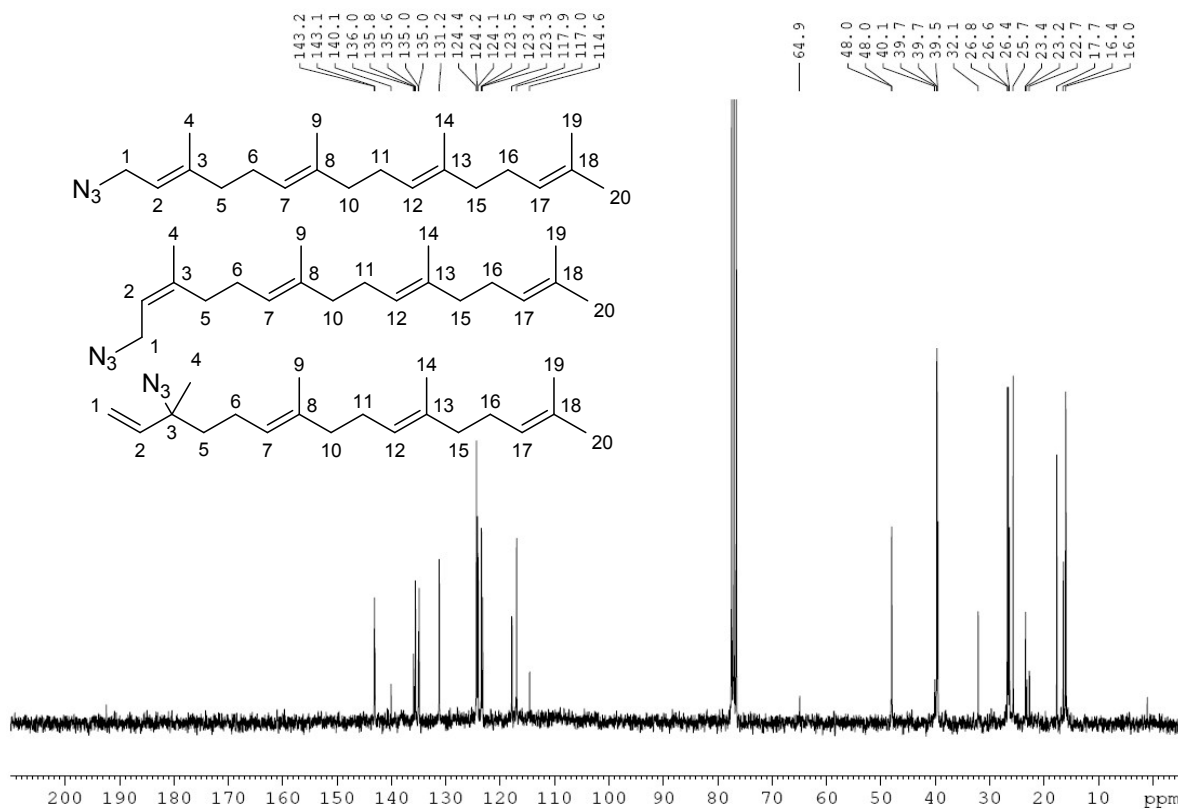

Spectral data of (*E*)-1-azido-3,7,11,15-tetramethylhexadec-2-ene (**6e-E**); (*Z*)-1-azido-3,7,11,15-tetramethylhexadec-2-ene (**6e-Z**) and (3*R*)-3-azido-3,7,11,15-tetramethylhexadec-1-ene (**6e-t**)

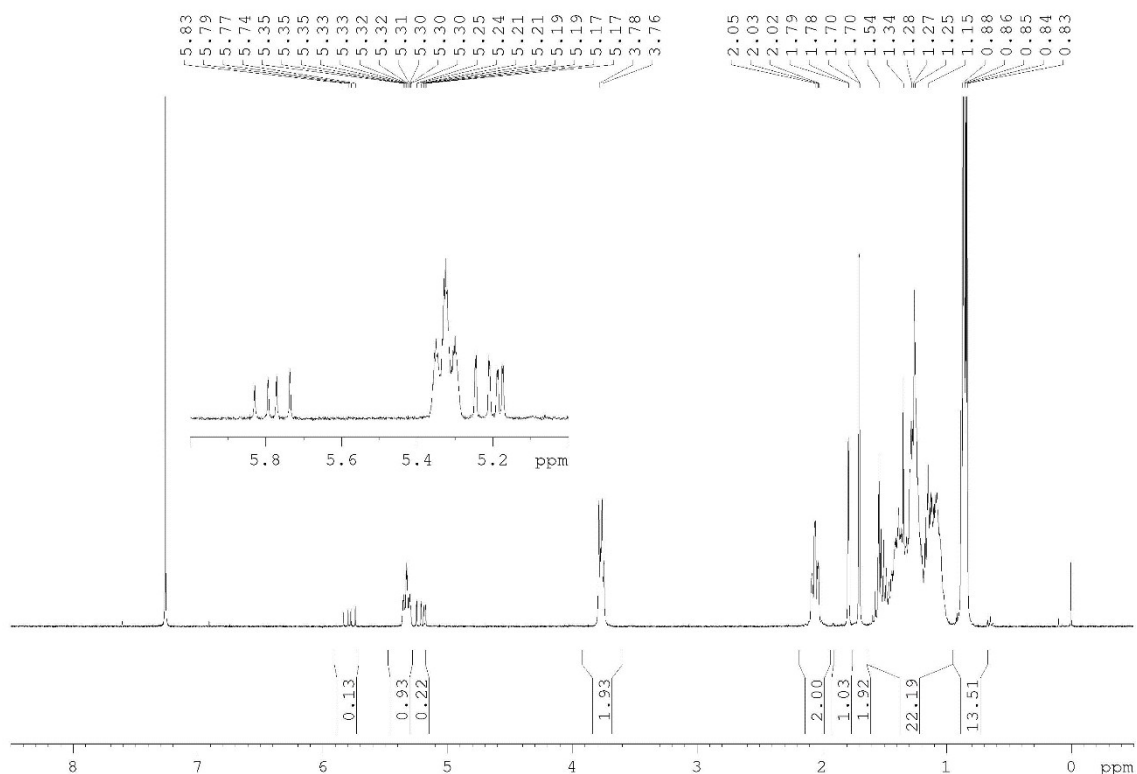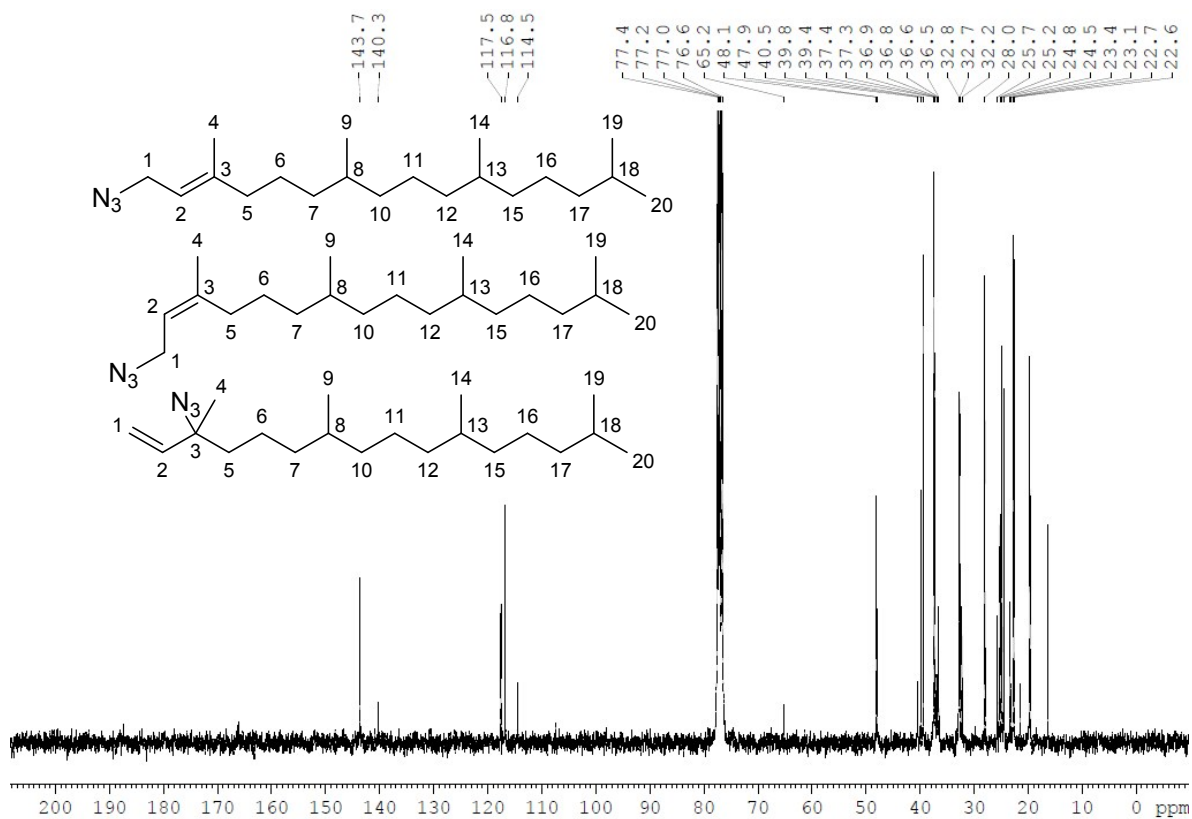

Spectral data of (*E*)-(3-azidoprop-1-en-1-yl) benzene (**8**)

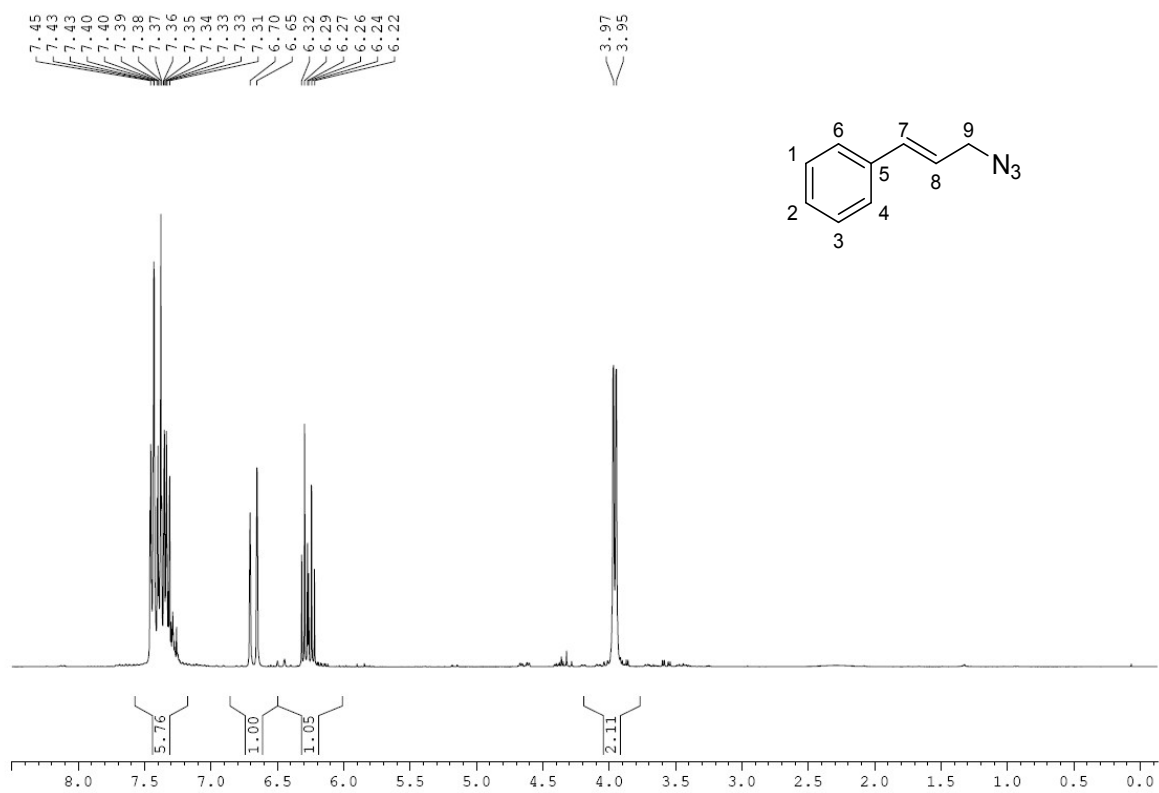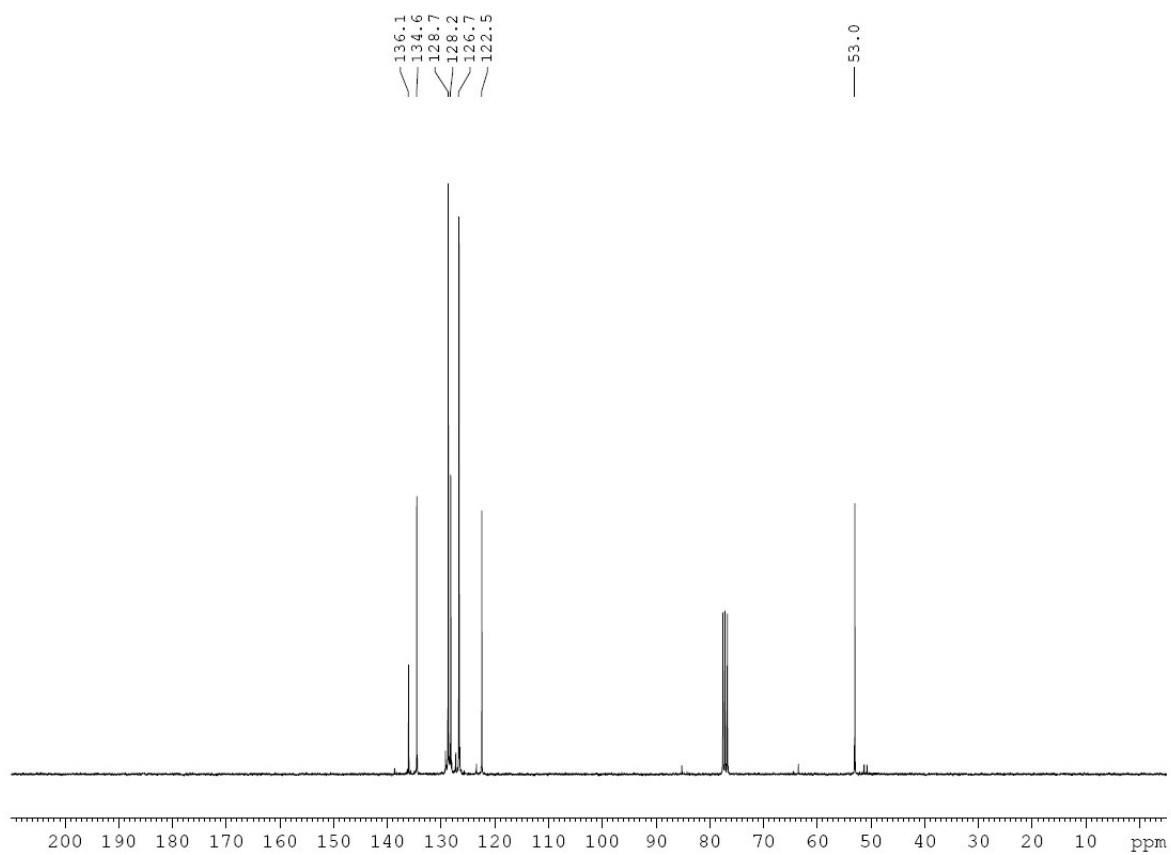



Spectral data of (*E*)-ethyl 3-phenylbut-2-enoate (**10E**) and (*Z*)-ethyl 3-phenylbut-2-enoate (**10Z**)

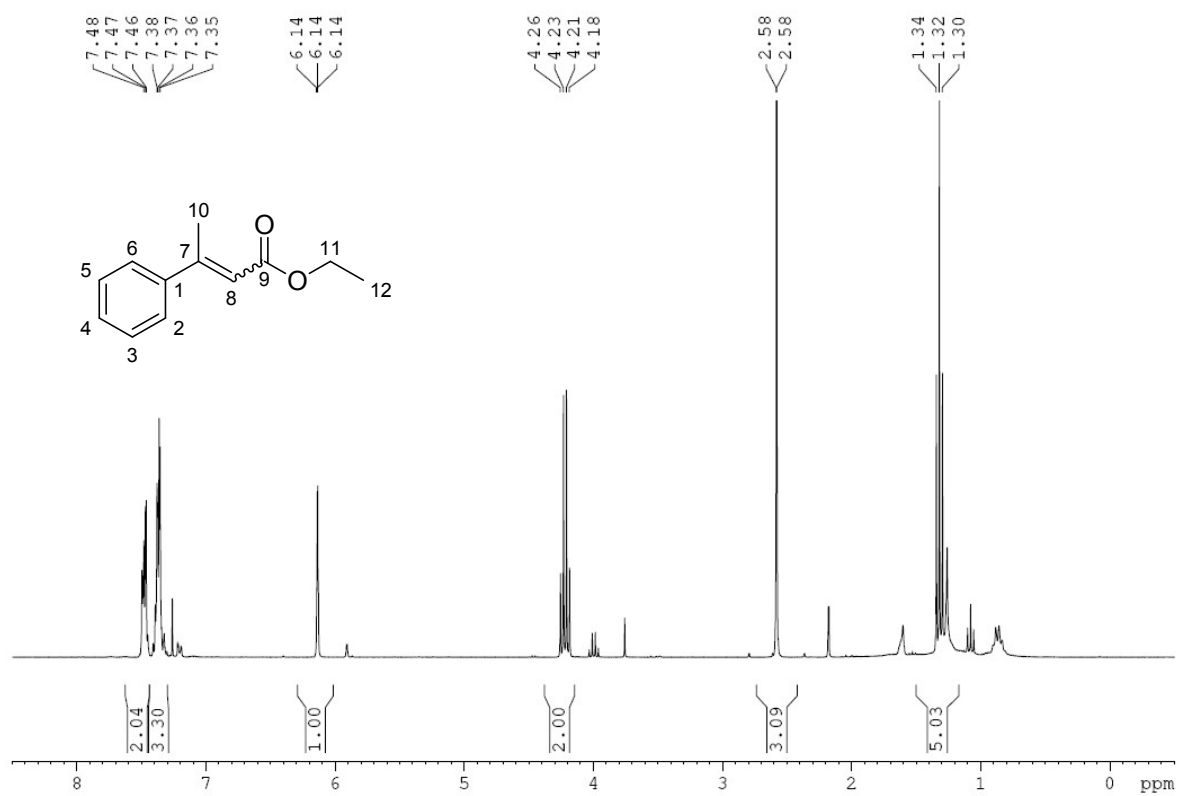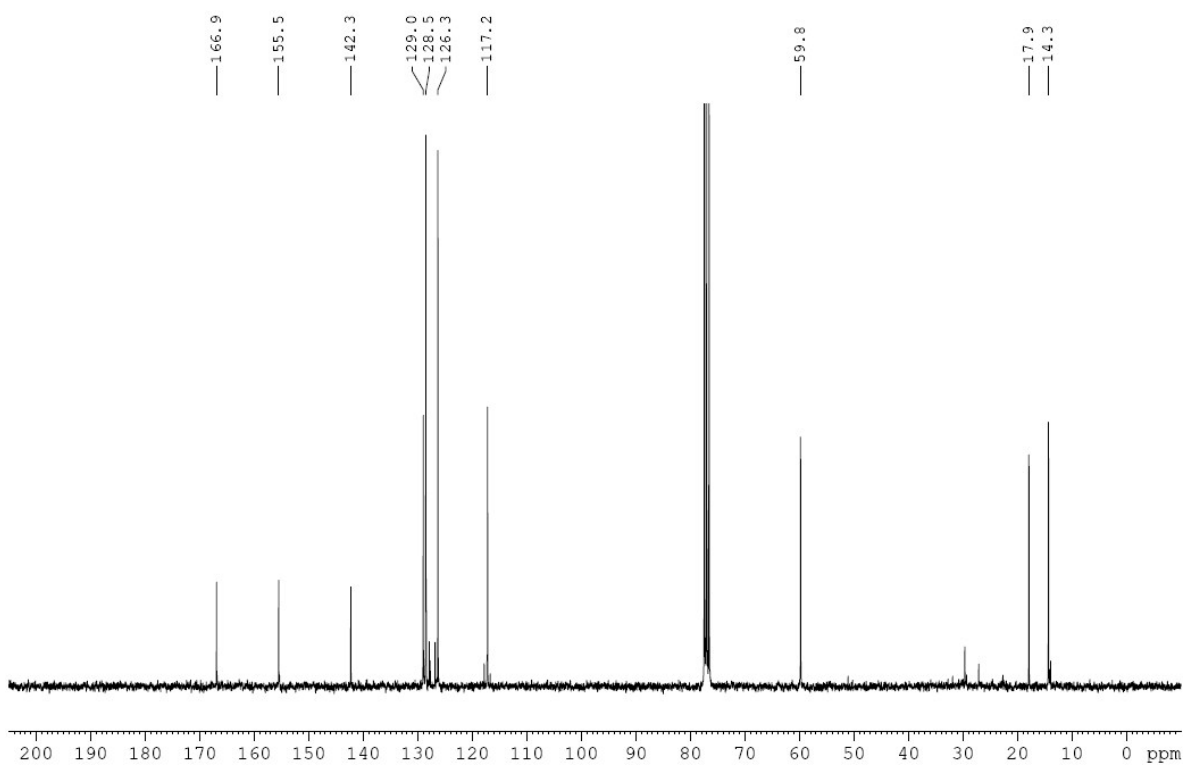

Spectral data of (*E*)-3-Phenylbut-2-en-1-ol (**11**)

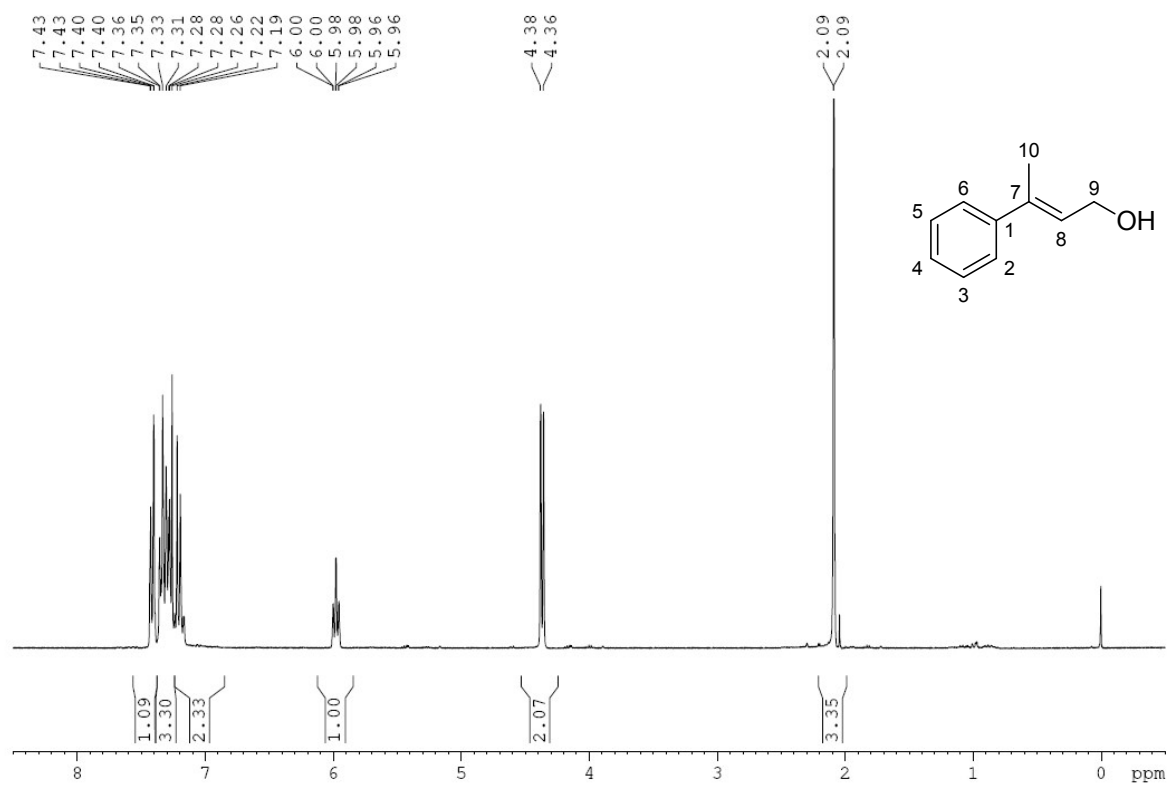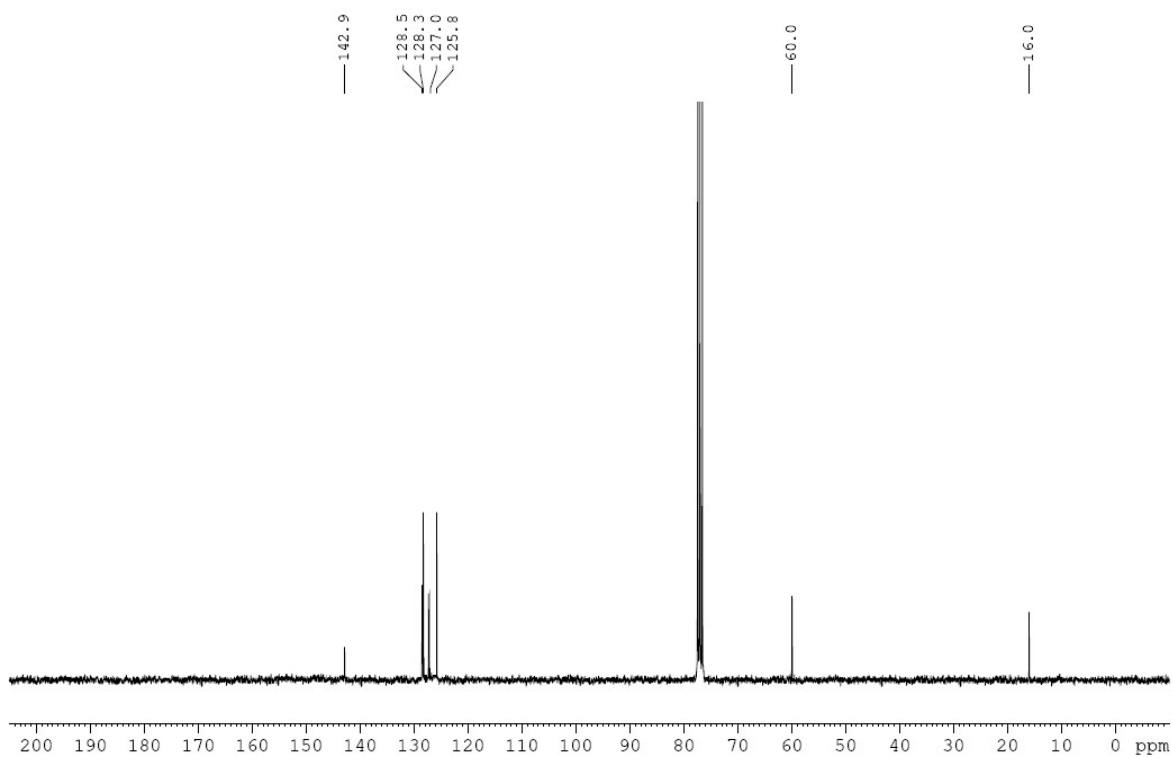

Spectral data of (*E*)-(4-azidobut-2-en-2-yl) benzene (**12**)

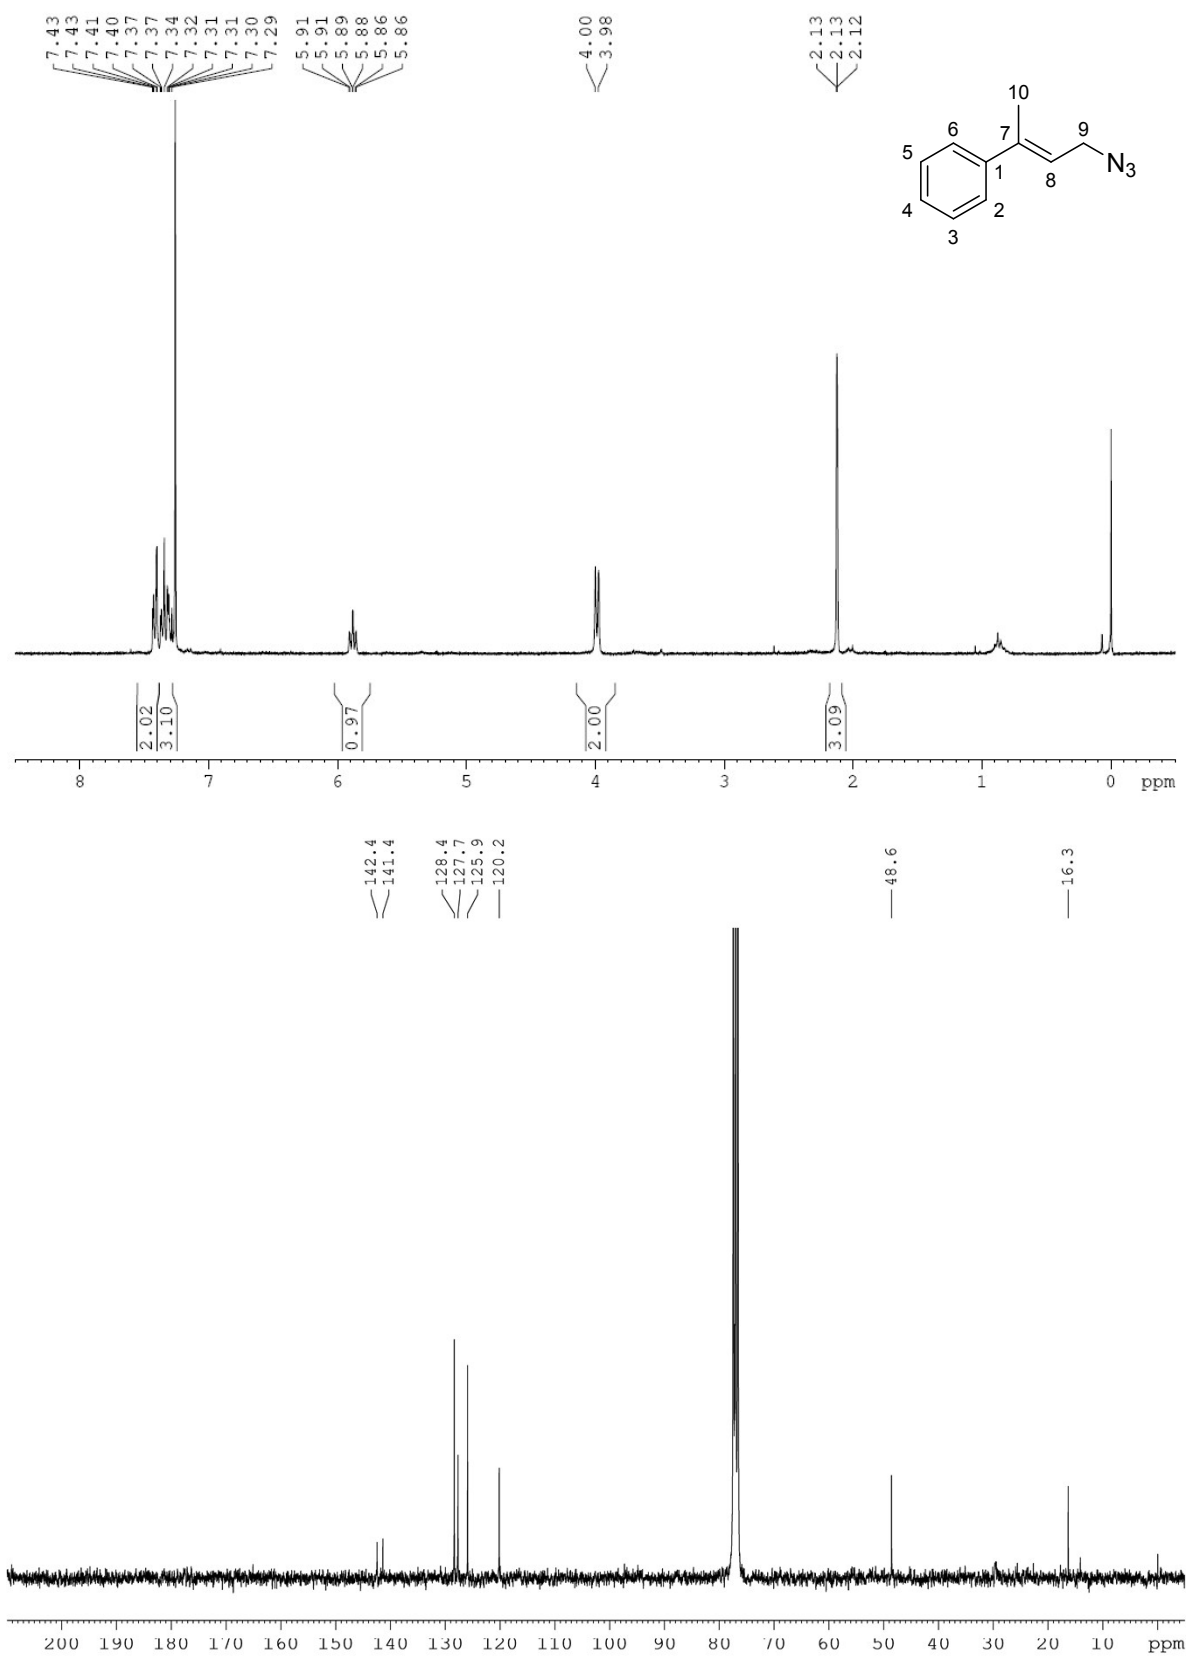

**Table S1.** Bond distances, local topological properties for the selected bond critical calculated at the TSs under study.<sup>a</sup>

| Species      | Bonds | $R$  | $\rho_b$ | $\nabla^2\rho_b$ | $\varepsilon$ | $H_b$  | $DI$ |
|--------------|-------|------|----------|------------------|---------------|--------|------|
| <b>TS-6a</b> | C1-C2 | 1.39 | 0.314    | -0.908           | 0.194         | -0.330 | 1.31 |
|              | C2-C3 | 1.37 | 0.322    | -0.952           | 0.218         | -0.350 | 1.43 |
|              | N1-N2 | 1.16 | 0.530    | -1.466           | 0.179         | -0.870 | 2.02 |
|              | N2-N3 | 1.16 | 0.529    | -1.464           | 0.183         | -0.868 | 2.03 |
| <b>TS-8</b>  | C1-C2 | 1.39 | 0.313    | -0.911           | 0.175         | -0.329 | 1.31 |
|              | C2-C3 | 1.37 | 0.326    | -0.971           | 0.224         | -0.356 | 1.45 |
|              | N1-N2 | 1.17 | 0.526    | -1.445           | 0.192         | -0.861 | 2.01 |
|              | N2-N3 | 1.16 | 0.534    | -1.488           | 0.185         | -0.883 | 2.05 |
| <b>TS-12</b> | C1-C2 | 1.40 | 0.309    | -0.886           | 0.179         | -0.320 | 1.28 |
|              | C2-C3 | 1.37 | 0.325    | -0.967           | 0.226         | -0.356 | 1.46 |
|              | N1-N2 | 1.17 | 0.527    | -1.447           | 0.185         | -0.866 | 2.01 |
|              | N2-N3 | 1.16 | 0.533    | -1.480           | 0.179         | -0.881 | 2.05 |

<sup>a</sup>Bond distances ( $R$ ) in Å;  $\rho_b$ ,  $\nabla^2\rho_b$ ,  $H_b$  in au.  $\varepsilon$  and  $DI$  are dimensionless

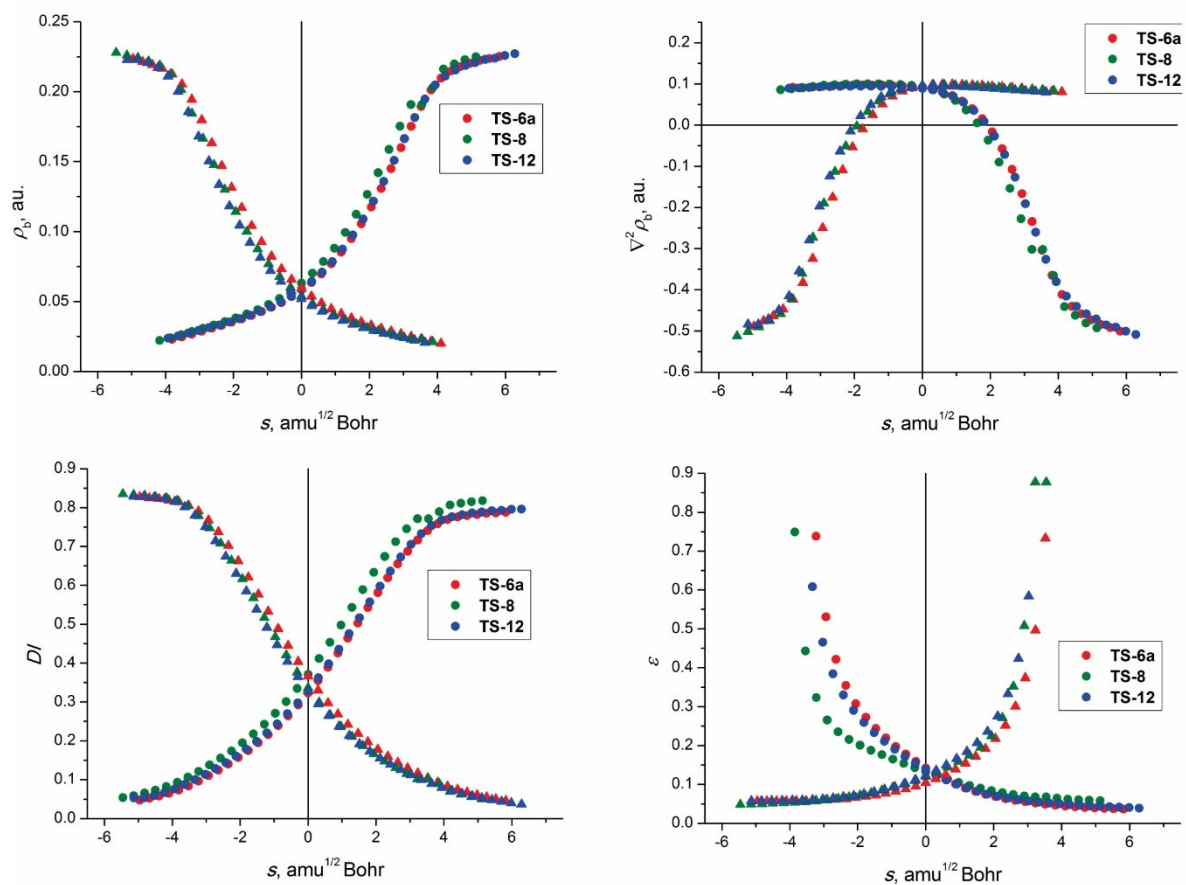

**Figure S1.** Topological properties and delocalization index at the C1-N1 (circle) and C3-N3 (triangle) bcps, along the IRC path corresponding to TS-6a, TS-8 and TS-12. TSs are located at  $s = 0.0 \text{ amu}^{1/2} \text{ Bohr}$ .

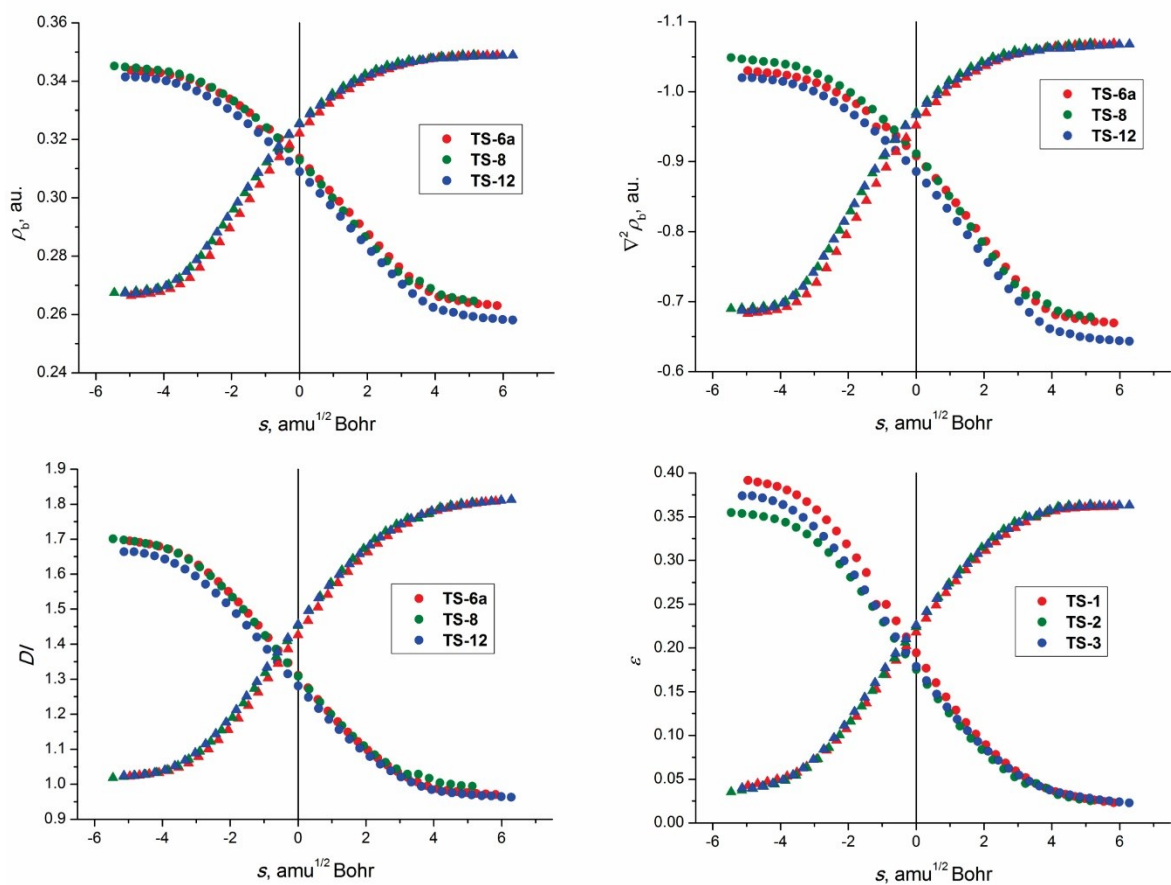

**Figure S2.** Topological properties and delocalization index at the C1-C2 (circle) and C2-C3 (triangle) bcps, along the IRC path corresponding to TS-6a, TS-8 and TS-12. TSs are located at  $s = 0.0 \text{ amu}^{1/2} \text{ Bohr}$ .

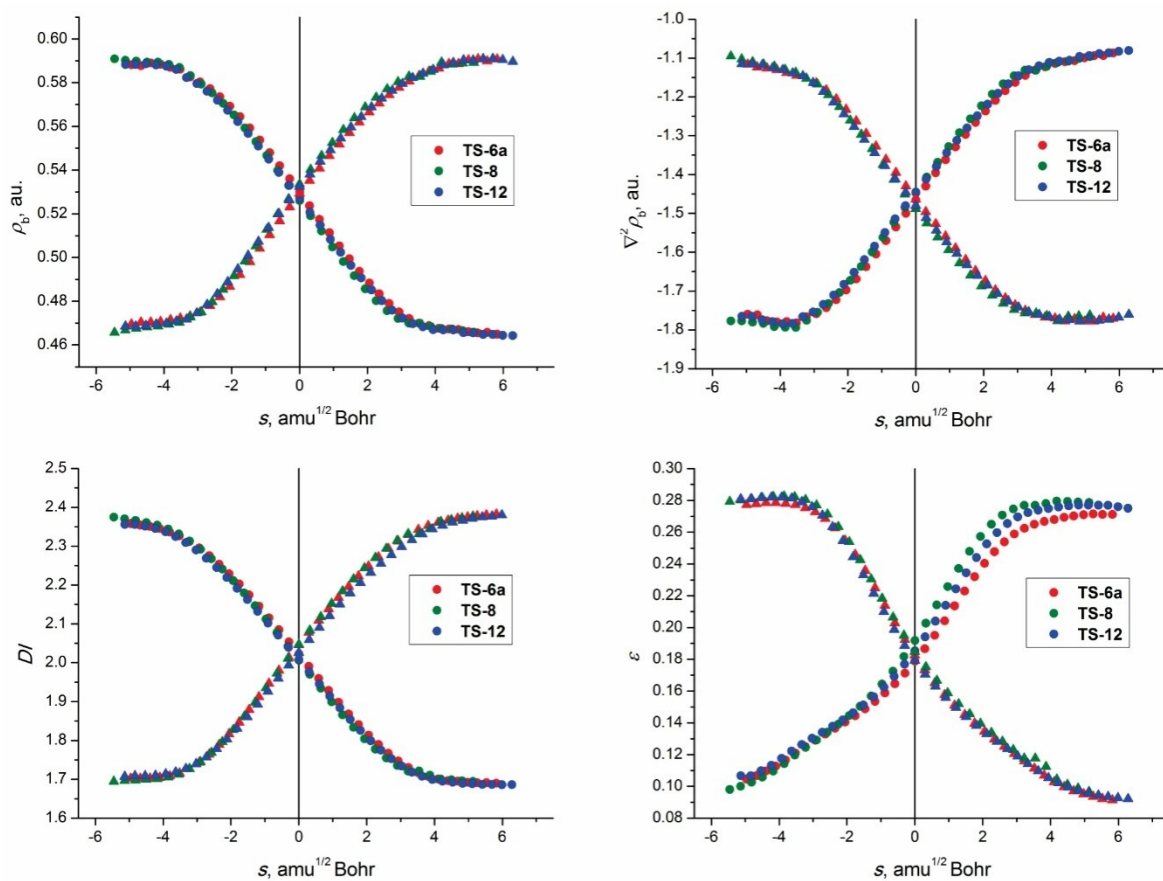

**Figure S3.** Topological properties and delocalization index at the N1-N2 (circle) and N2-N3 (triangle) bcps, along the IRC path corresponding to **TS-6a**, **TS-8** and **TS-12**. TSs are located at  $s = 0.0 \text{ amu}^{1/2} \text{ Bohr}$ .

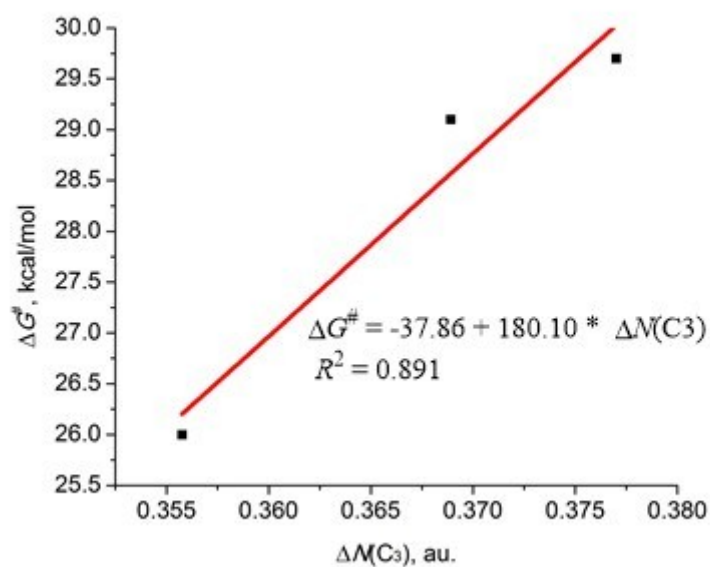

**Figure S4.** Relationship between  $\Delta G^\ddagger$  for the [3,3]-sigmatropic reactions under study and  $\Delta N(C_3)$ .

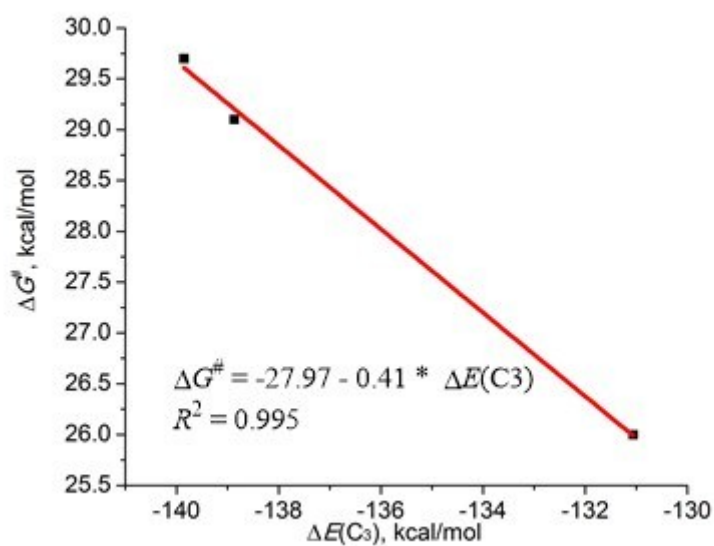

**Figure S5.** Relationship between  $\Delta G^\ddagger$  for the [3,3]-sigmatropic reactions under study and  $\Delta E(C_3)$ .



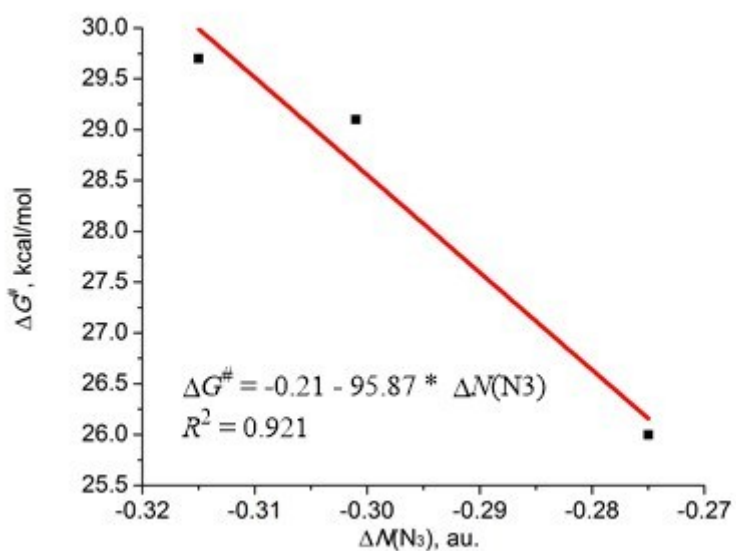

**Figure S6.** Relationship between  $\Delta G^\ddagger$  for the [3,3]-sigmatropic reactions under study and  $\Delta N(N3)$ .

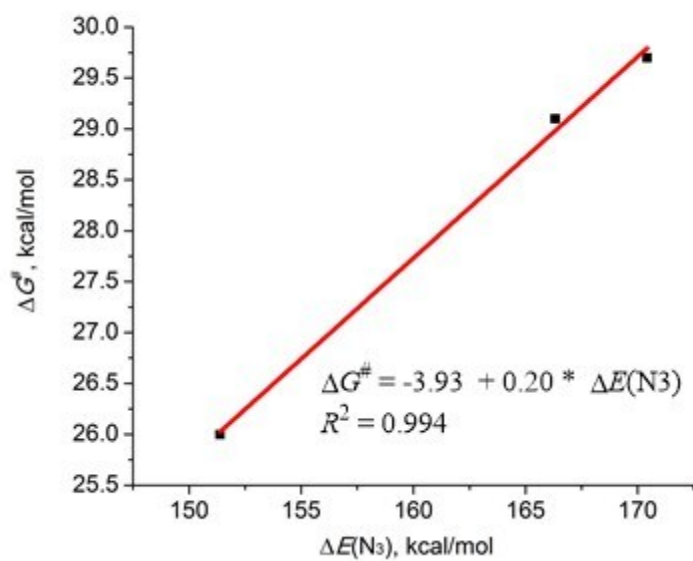

**Figure S7.** Relationship between  $\Delta G^\ddagger$  for the [3,3]-sigmatropic reactions under study and  $\Delta E(N3)$ .

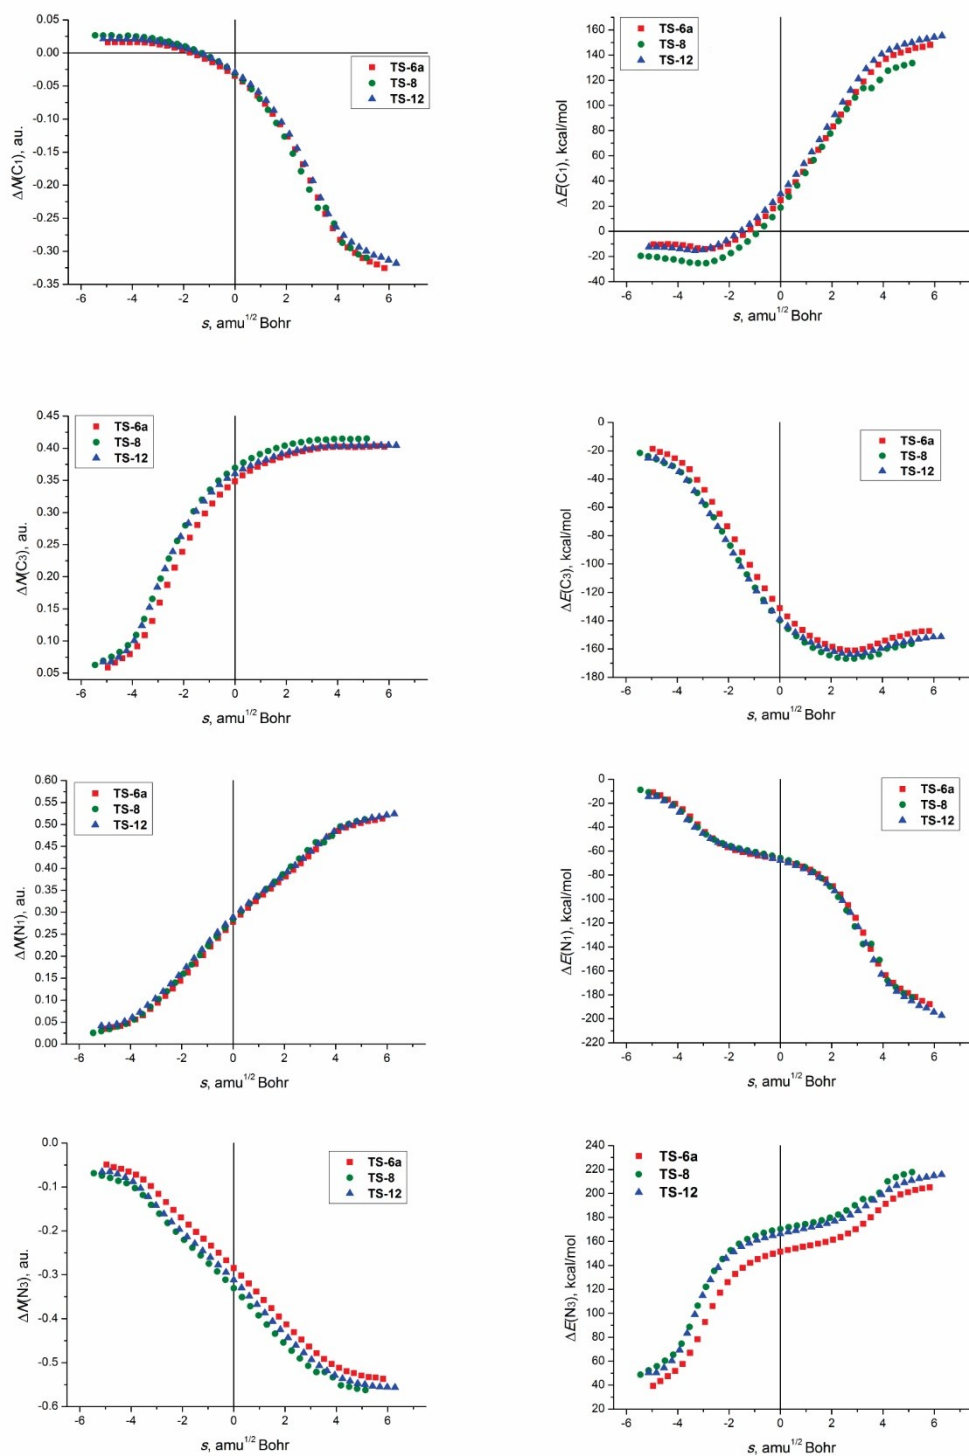

**Figure S8.** Changes in electron population and atomic energy for the C1, C2, N1 and N3 atoms along the IRC path corresponding **TS-6a**, **TS-8** and **TS-12**. TSs are located at  $s = 0.0$  amu<sup>1/2</sup> Bohr.

Cartesian coordinates, unique frequency imaginary, and computed absolute electronic energies (including zero-point energy -ZPE- corrections) and free energy of the stationary points involved in reactions under study.

**6a**

|   |           |           |           |
|---|-----------|-----------|-----------|
| C | -1.834306 | -0.025759 | 0.023523  |
| C | -3.046317 | -0.874595 | -0.168101 |
| C | -0.660476 | -0.584615 | 0.296548  |
| C | 0.627673  | 0.108592  | 0.541770  |
| N | 1.619506  | -0.372199 | -0.436529 |
| N | 2.768129  | -0.071014 | -0.189330 |
| N | 3.853339  | 0.160058  | -0.043129 |
| C | -2.081491 | 1.437847  | -0.117599 |
| H | -3.469096 | -0.720669 | -1.159928 |
| H | -3.822348 | -0.604801 | 0.546948  |
| H | -2.823356 | -1.929955 | -0.049942 |
| H | -0.610307 | -1.663152 | 0.363392  |
| H | 0.987212  | -0.119043 | 1.545838  |
| H | 0.536696  | 1.187170  | 0.457768  |
| H | -1.186224 | 2.042990  | -0.044242 |
| H | -2.780638 | 1.777552  | 0.645259  |
| H | -2.549249 | 1.643179  | -1.079023 |

Sum of electronic and zero-point Energies = -359.871115 au.

Sum of electronic and thermal Free Energies = -359.906278 au.

**8**

|   |           |           |           |
|---|-----------|-----------|-----------|
| C | -4.092403 | -0.231199 | 0.004039  |
| C | -3.321917 | -1.377019 | 0.017988  |
| C | -1.943957 | -1.283299 | 0.010826  |
| C | -1.305886 | -0.048734 | -0.007692 |
| C | -2.095868 | 1.097770  | -0.024969 |
| C | -3.47107  | 1.006128  | -0.018295 |
| C | 0.155437  | -0.024897 | -0.009883 |
| C | 0.932929  | 1.047185  | 0.031765  |
| C | 2.416169  | 1.020898  | 0.029622  |
| N | 2.907662  | -0.351018 | -0.029315 |
| N | 4.114209  | -0.470973 | -0.013026 |
| N | 5.211797  | -0.684115 | -0.002890 |
| H | -5.168338 | -0.297688 | 0.008671  |
| H | -3.793041 | -2.346705 | 0.033906  |
| H | -1.345038 | -2.180961 | 0.021728  |
| H | -1.634722 | 2.072007  | -0.048078 |
| H | -4.064563 | 1.906384  | -0.032888 |
| H | 0.632663  | -0.994037 | -0.044187 |
| H | 0.512469  | 2.041450  | 0.074374  |
| H | 2.791321  | 1.587303  | -0.824774 |
| H | 2.792954  | 1.514001  | 0.927465  |

Sum of electronic and zero-point Energies = -512.241193 au.

Sum of electronic and thermal Free Energies = -512.281160 au.

**12**

|   |           |           |           |
|---|-----------|-----------|-----------|
| N | -3.216071 | -0.783040 | -0.199780 |
| C | -2.351448 | 0.370221  | 0.057323  |
| C | -0.934889 | -0.085320 | -0.022923 |
| C | 0.123318  | 0.698539  | 0.160589  |
| C | 1.493345  | 0.159422  | 0.062434  |
| C | -0.016533 | 2.160723  | 0.437205  |
| N | -4.407053 | -0.554452 | -0.161866 |
| N | -5.519783 | -0.443067 | -0.149217 |
| C | 1.782460  | -1.162467 | 0.387075  |
| C | 3.065311  | -1.657113 | 0.275345  |
| C | 4.094636  | -0.839502 | -0.155120 |
| C | 3.826474  | 0.479122  | -0.465312 |
| C | 2.541512  | 0.974224  | -0.350972 |
| H | -2.555083 | 1.149422  | -0.678274 |
| H | -2.576622 | 0.784468  | 1.041346  |
| H | -0.804622 | -1.127029 | -0.273363 |
| H | -1.020841 | 2.419072  | 0.755466  |
| H | 0.676287  | 2.479126  | 1.211813  |
| H | 0.203387  | 2.750507  | -0.451736 |
| H | 0.997374  | -1.804581 | 0.752499  |
| H | 3.265201  | -2.683456 | 0.538867  |
| H | 5.097731  | -1.225445 | -0.237635 |
| H | 4.620448  | 1.128874  | -0.797322 |
| H | 2.351975  | 2.005865  | -0.599482 |

Sum of electronic and zero-point Energies = -551.511466 au.

Sum of electronic and thermal Free Energies = -551.553171 au.

**TS-6a**1 imaginary frequency : -373.2 cm<sup>-1</sup>

|   |           |           |           |
|---|-----------|-----------|-----------|
| C | 0.949933  | 0.239388  | 0.001293  |
| C | 0.039980  | 1.065156  | -0.652867 |
| C | 2.171674  | -0.209363 | -0.716679 |
| C | -1.134841 | 1.471786  | -0.073336 |
| C | 1.007323  | 0.154839  | 1.489130  |
| H | 0.146782  | 1.161646  | -1.723146 |
| H | 2.032578  | -0.199407 | -1.791866 |
| H | 2.995237  | 0.459909  | -0.467546 |
| H | 2.455920  | -1.208153 | -0.402927 |
| H | -1.858109 | 2.016323  | -0.656914 |
| H | -1.236758 | 1.559143  | 0.993816  |
| H | 1.582723  | 0.999034  | 1.868632  |
| H | 0.028248  | 0.178054  | 1.954132  |
| H | 1.509339  | -0.756097 | 1.795272  |
| N | -0.219290 | -1.520455 | -0.217798 |
| N | -1.281207 | -1.064562 | -0.078174 |
| N | -2.193842 | -0.349452 | 0.031015  |

Sum of electronic and zero-point Energies = -359.832707 au.

Sum of electronic and thermal Free Energies = -359.864810 au.

**TS-8**1 imaginary frequency : -366.2 cm<sup>-1</sup>

|   |           |           |           |
|---|-----------|-----------|-----------|
| C | -3.493824 | -0.140564 | -0.283284 |
| C | -3.015013 | 0.952312  | 0.412386  |
| C | -1.667980 | 1.049595  | 0.698125  |
| C | -0.787855 | 0.050511  | 0.305298  |
| C | -1.277050 | -1.039955 | -0.403730 |
| C | -2.621109 | -1.134008 | -0.693677 |
| C | 0.624040  | 0.185475  | 0.650379  |
| C | 1.494191  | -0.885170 | 0.831951  |
| C | 2.800748  | -0.650585 | 1.157117  |
| H | -4.544246 | -0.217634 | -0.513085 |
| H | -3.689239 | 1.731501  | 0.728516  |
| H | -1.289781 | 1.905293  | 1.235346  |
| H | -0.603027 | -1.808563 | -0.745296 |
| H | -2.991244 | -1.981402 | -1.247555 |
| H | 0.886936  | 1.111850  | 1.138344  |
| H | 1.197935  | -1.871604 | 0.511120  |
| H | 3.506335  | -1.460294 | 1.232505  |
| H | 3.089233  | 0.283103  | 1.611469  |
| N | 1.401720  | 0.952193  | -1.123295 |
| N | 2.514464  | 0.615027  | -1.027097 |
| N | 3.526705  | 0.144507  | -0.706573 |

Sum of electronic and zero-point Energies = -512.197275 au.

Sum of electronic and thermal Free Energies = -512.233836 au.

**TS-12**

1 imaginary frequency : -345.9 cm-1

|   |           |           |           |
|---|-----------|-----------|-----------|
| C | -3.565006 | -0.488680 | 0.001566  |
| C | -3.183682 | 0.830610  | -0.139133 |
| C | -1.845909 | 1.175935  | -0.099504 |
| C | -0.875385 | 0.205167  | 0.102732  |
| C | -1.268905 | -1.120926 | 0.236136  |
| C | -2.601666 | -1.465831 | 0.183260  |
| C | 0.550608  | 0.571663  | 0.201354  |
| C | 1.308853  | -0.014989 | 1.221147  |
| C | 0.984505  | 1.845316  | -0.444111 |
| C | 2.646336  | 0.214257  | 1.377394  |
| H | -4.608126 | -0.757812 | -0.039298 |
| H | -3.927932 | 1.596923  | -0.283866 |
| H | -1.563314 | 2.209818  | -0.211057 |
| H | -0.515944 | -1.885446 | 0.343139  |
| H | -2.890966 | -2.500317 | 0.273576  |
| H | 0.861478  | -0.835000 | 1.761165  |
| H | 2.056079  | 1.873952  | -0.602197 |
| H | 0.498061  | 1.972969  | -1.403827 |
| H | 0.717798  | 2.687578  | 0.193030  |
| H | 3.200918  | -0.341820 | 2.114619  |
| H | 3.123132  | 1.102757  | 1.004037  |
| N | 1.322937  | -0.660019 | -1.348726 |
| N | 2.422206  | -0.781177 | -0.980578 |
| N | 3.419189  | -0.792910 | -0.384177 |

Sum of electronic and zero-point Energies = -551.470094 au.

Sum of electronic and thermal Free Energies = -551.506832 au.



**6a rearr**

|   |           |           |           |
|---|-----------|-----------|-----------|
| N | -0.466785 | -0.834309 | -0.000043 |
| N | -1.665196 | -0.654938 | -0.000012 |
| N | -2.782575 | -0.587993 | 0.000010  |
| C | 0.360474  | 0.392829  | -0.000001 |
| C | 0.068257  | 1.207939  | -1.249116 |
| C | 0.068271  | 1.207867  | 1.249164  |
| C | 1.791352  | -0.042243 | -0.000012 |
| C | 2.228352  | -1.286503 | -0.000007 |
| H | 0.708786  | 2.084724  | -1.283232 |
| H | 0.243390  | 0.616068  | -2.142194 |
| H | -0.964587 | 1.550576  | -1.251119 |
| H | 0.708829  | 2.084628  | 1.283331  |
| H | -0.964561 | 1.550537  | 1.251188  |
| H | 0.243391  | 0.615938  | 2.142206  |
| H | 2.494482  | 0.780000  | -0.000019 |
| H | 3.285602  | -1.499340 | -0.000012 |
| H | 1.546328  | -2.121782 | 0.000001  |

Sum of electronic and zero-point Energies = -359.869885 au.

Sum of electronic and thermal Free Energies = -359.903369 au.

## 8 rearr

|   |           |           |           |
|---|-----------|-----------|-----------|
| C | -3.066899 | -0.294305 | -0.301301 |
| C | -2.630641 | 0.402973  | 0.807015  |
| C | -1.281942 | 0.436904  | 1.115340  |
| C | -0.365043 | -0.229131 | 0.321915  |
| C | -0.809009 | -0.924748 | -0.792860 |
| C | -2.152711 | -0.956798 | -1.102724 |
| C | 1.108088  | -0.156881 | 0.638212  |
| C | 1.751286  | -1.502280 | 0.651409  |
| N | 1.817245  | 0.691381  | -0.335082 |
| N | 1.408309  | 1.832884  | -0.403270 |
| N | 1.095205  | 2.897517  | -0.533942 |
| C | 2.753955  | -1.877812 | -0.118794 |
| H | -4.117043 | -0.322790 | -0.543568 |
| H | -3.337737 | 0.922645  | 1.433249  |
| H | -0.939814 | 0.982538  | 1.981637  |
| H | -0.094052 | -1.441502 | -1.414475 |
| H | -2.490346 | -1.501224 | -1.969886 |
| H | 1.217132  | 0.287742  | 1.629058  |
| H | 1.318222  | -2.190533 | 1.363247  |
| H | 3.160336  | -2.874079 | -0.047953 |
| H | 3.195488  | -1.202807 | -0.834530 |

Sum of electronic and zero-point Energies = -512.233128 au.

Sum of electronic and thermal Free Energies = -512.270931 au.

## 12 rearr

|   |           |           |           |
|---|-----------|-----------|-----------|
| C | 2.389673  | -2.071887 | -0.564356 |
| C | 1.551402  | -1.612635 | 0.344225  |
| C | 1.040856  | -0.206530 | 0.441310  |
| C | -0.466957 | -0.207269 | 0.234635  |
| C | 1.467920  | 0.387267  | 1.771758  |
| C | -0.967057 | -0.680891 | -0.971798 |
| C | -2.322975 | -0.690614 | -1.217541 |
| C | -3.205601 | -0.230341 | -0.255060 |
| C | -2.718331 | 0.240150  | 0.945856  |
| C | -1.354767 | 0.253962  | 1.189889  |
| N | 1.682486  | 0.561111  | -0.653692 |
| N | 1.291703  | 1.705179  | -0.766589 |
| N | 0.989618  | 2.766533  | -0.944631 |
| H | 2.704070  | -3.103375 | -0.549208 |
| H | 2.783588  | -1.437082 | -1.341719 |
| H | 1.166575  | -2.266584 | 1.114363  |
| H | 1.119131  | 1.411884  | 1.877443  |
| H | 1.076226  | -0.195299 | 2.600064  |
| H | 2.551280  | 0.382155  | 1.830616  |
| H | -0.278397 | -1.042009 | -1.720175 |
| H | -2.694172 | -1.059736 | -2.160100 |
| H | -4.266830 | -0.238772 | -0.444545 |
| H | -3.397423 | 0.602451  | 1.700796  |
| H | -0.995671 | 0.629333  | 2.133341  |

Sum of electronic and zero-point Energies = -551.505665 au.

Sum of electronic and thermal Free Energies = -551.543911 au.
